# 1 **Metabolic control of YAP via the acto-myosin system during liver regeneration**

2 **Authors:** Kirstin Meyer<sup>1</sup>, Hernan Morales-Navarrete<sup>1</sup>, Sarah Seifert<sup>1</sup>, Michaela Wilsch-Braeuning<sup>1</sup>,  
3 Uta Dahmen<sup>2</sup>, Elly M. Tanaka<sup>3</sup>, Lutz Brusch<sup>5</sup>, Yannis Kalaidzidis<sup>1,4</sup> and Marino Zerial<sup>1,\*</sup>

## 4 **Affiliations:**

- 5 1) Max Planck Institute of Molecular Cell Biology and Genetics, Dresden, Saxony 01307, Germany
  - 6 2) Experimental Transplantation Surgery, Department of General, Visceral and Vascular Surgery,  
7 Jena University Hospital, 07747 Jena, Germany
  - 8 3) Research Institute of Molecular Pathology, Vienna Biocenter, 1030, Vienna, Austria
  - 9 4) Faculty of Bioengineering and Bioinformatics, Moscow State University, 119991 Moscow,  
10 Russia
  - 11 5) Center for Information Services and High Performance Computing, Technische Universität  
12 Dresden, 01062 Dresden, Germany
- 13 \* Corresponding Author

14

## 15 **Abstract**

16 The mechanisms of organ size control remain poorly understood. A key question is how cells  
17 collectively sense the overall status of a tissue. We addressed this problem focusing on mouse liver  
18 regeneration, which is controlled by Hippo signalling. Using digital tissue reconstruction and  
19 quantitative image analysis, we found that the apical surface of hepatocytes forming the bile  
20 canalicular network expands concomitant with an increase of F-actin and phospho-Myosin, to  
21 compensate an overload of bile acids. Interestingly, these changes are sensed by the Hippo  
22 transcriptional co-activator YAP, which localizes to the apical F-actin-rich region and translocates to  
23 the nucleus in dependence of the acto-myosin system. This mechanism tolerates moderate bile acid  
24 fluctuations under tissue homeostasis, but activates YAP in response to sustained bile acid overload.  
25 Using an integrated biophysical-biochemical model of bile pressure and Hippo signalling, we explained  
26 this behaviour by the existence of a mechano-sensory mechanism that activates YAP in a switch-like  
27 manner. We propose that the apical surface of hepatocytes acts as a self-regulatory mechano-sensory  
28 system that responds to critical levels of bile acids as readout of tissue status.

29

## 30 **Introduction**

31 Organ size control is a fundamental aspect of morphogenesis. It requires a control system acting  
32 throughout scales of organization to coordinate local cell behavior with global tissue properties.  
33 Structural, biochemical and mechanical properties of tissues regulate cell proliferation and

34 differentiation (1,2), cell geometry (3) and the growth and organization of cells into tissues (4).  
35 Mechanical properties of tissues emerge from the interaction of cells and their environment. These  
36 include local cell-cell and cell-matrix interactions as well as systemic factors such as blood pressure,  
37 fluid shear stress and muscle tension. Cells respond to biochemical or mechanical alterations through  
38 the activation of signaling pathways and downstream effectors, of which one of the most important  
39 is the actin cytoskeleton. It is able to generate forces via the acto-myosin system and controls cell  
40 behavior through signaling cascades, such as the Hippo and SRF pathways. Current concepts on the  
41 reciprocal regulation of tissue structure and cell behavior are primarily derived from studies *in vitro*  
42 and *ex vivo* (5,6). However, the responses of cells to the structural and mechanical properties within  
43 tissues are largely unexplored.

44 Liver regeneration provides an excellent example of organ size control. Liver mass scales with body  
45 size, constituting about 5% of the body weight in rodents (7) and has the capacity to regenerate the  
46 original mass (8). The liver consists of functional units or *lobuli*. Each lobule contains two opposing  
47 fluid networks, the sinusoidal endothelial and bile canaliculi (BC) networks that transport blood and  
48 bile between portal and central vein (PV-CV), respectively. The hepatocytes are polarized cells at the  
49 interface of both networks. They take up metabolites from the blood via their basal plasma  
50 membranes and secrete waste products and bile via their apical membranes, which collectively, form  
51 a continuous network that drains into bile ducts.

52 Several signalling pathways are required for liver regeneration (9,10) of which the Hippo pathway is a  
53 key regulator of liver size (11,12). The Hippo pathway is activated during liver regeneration (13) to  
54 promote hepatocyte proliferation primarily via the co-transcriptional activator yes-associated protein  
55 (YAP). It is a mechano-sensor for signals from the actin cytoskeleton, cell polarity complexes and cell-  
56 cell or cell-matrix junctions (14–16) and is also responsive to high concentrations of bile acids (BA)  
57 (17). Despite these molecular insights, how cells sense the overall tissue status and size remains an  
58 open question. In particular, it is unclear how cells integrate metabolic (BA levels) and/or mechanical  
59 alterations, like changes in blood and bile pressure, to control liver size during homeostasis and  
60 regeneration. Here, we addressed these questions by applying high-resolution microscopy and  
61 quantitative 3D image analysis (18,19) to explore tissue and cellular alterations during liver  
62 regeneration.

63

## 64 **Results**

### 65 **Alterations of the BC network during liver regeneration**

66 Tissue sections of liver from different time points after partial hepatectomy (PH) (0.8-5d post PH) were  
67 stained for the apical marker CD13 by immunofluorescence (IF), imaged at high resolution by confocal  
68 microscopy and the 3D BC network reconstructed from IF image stacks. The analysis revealed  
69 remarkable changes of BC network topology and geometry. The BC network dilated and branched as  
70 early as 0.8d post PH (Fig.1a) throughout the entire CV-PV axis and reversed to normal at ~3-5d post  
71 PH. Spatial quantification revealed an increase of BC diameter by up to 27% (zone 11) and on average  
72 by 21% throughout the entire CV-PV axis at 1.5d after PH as compared to the untreated liver (1.96-  
73 2.27 $\mu$ m in untreated liver; 2.40-2.61 $\mu$ m at 1.5d post PH,; Fig.1b). At 5d post PH, the BC diameter was  
74 still increased, but only by 11% on average (BC diameter at 5d post PH, 2.14-2.51 $\mu$ m). In addition, the  
75 BC lacked the typical smooth and regular appearance at this resolution and acquired a rough surface  
76 texture (Fig.1a, compare BC in PV area of untreated vs. 1.5d post PH). This could reflect alterations of  
77 the acto-myosin system, which mediates apical contractility and regulates BC geometry and bile flow  
78 (18,27). Interestingly, the observed structural changes preceded the reported temporal profile of  
79 hepatocyte proliferation, which starts at 1.5d post PH and peaks at 2d (28). The structural alterations  
80 of the BC network may just be an epiphenomenon or play an active role in liver regeneration.  
81 Therefore, we set to analyze the nature and cause of BC network expansion.

82

### 83 **Expansion of the apical surface of hepatocytes during liver regeneration**

84 The observed BC diameter increase could be due to a bona fide expansion of the apical surface area  
85 of hepatocytes or be only apparent, e.g. due to decreased contractility of the actomyosin cortex  
86 and/or flattening of microvilli. To distinguish between these possibilities, we quantified BC membrane  
87 length and perimeter by electron microscopy (EM) at 1.8d post PH or control operated (sham) and  
88 untreated mice (Fig.1c-e). The apical membrane length was determined by segmentation of the BC,  
89 whereas the BC perimeter was estimated by calculating the minimal enclosing ellipse of these  
90 segmentations (Fig.S1). The EM analysis (Fig.1c) confirmed the BC expansion (Fig.1a). Both BC  
91 perimeter and total membrane length increased to a similar extent, 1.5 and 1.4-fold, respectively  
92 (Fig.1d, e). Thus, the primary cause of network dilation is an increase in total apical membrane of  
93 hepatocytes.

94 Liver resection induces a transient overload of BA (29). The observed BC network expansion could be  
95 a compensatory response to increased apical secretion and changes of biliary fluid dynamics. To test  
96 if BA overload can replicate the BC network expansion, we examined the BC network structure in  
97 cholestatic livers, using the model of bile duct ligation (BDL). In this model, the common bile duct is  
98 ligated, resulting in BA overload of the organ. After BDL, the BC network in the liver was branched and

99 expanded (Fig.1f), strikingly resembling regenerating liver. As in regeneration, the expansion occurred  
100 already at 1d post-BDL throughout the entire CV-PV axis, preceding hepatocyte proliferation (30).  
101 Based on these results, we hypothesize that the expansion of the BC network could be part of a  
102 mechano-sensory system that responds to increased BA levels to induce liver growth during  
103 regeneration.

104

#### 105 **Expansion of the apical surface of hepatocytes is associated with increased acto-myosin levels**

106 BC possess a dense sub-apical contractile actin mesh via the acto-myosin system (18,27) which  
107 contributes to BC geometry and bile flow (18). To test whether the actin cytoskeleton is modified along  
108 with the changes in BC during regeneration, we quantified the levels of apical F-actin (phalloidin,  
109 Fig.2a, Fig.S2a) and phospho-Myosin light chain (pMLC, Fig.2c, Fig.S2b) at the apical area of  
110 hepatocytes at different time points after PH or sham operation. We had to take into consideration  
111 the effects of the sham operation itself on the actin cytoskeleton: The apical F-actin density  
112 progressively decreased by up to 37±9% (mean±s.e.m.) compared to untreated mice (Fig.2b),  
113 presumably due to the laparotomy and/or anesthesia/analgesia. However, upon PH, the F-actin  
114 intensity was higher than in sham operation and fluctuated at baseline levels as compared to  
115 untreated mice, with a maximum increase of 17±10% (mean±s.e.m) at 1.5d (Fig.2b). In comparison to  
116 F-actin, apical pMLC intensity increased more dramatically during regeneration (Fig.2c, d). Whereas in  
117 sham-operated mice, apical pMLC levels remained similar to baseline levels, within a maximum  
118 increase of 30±9% (mean±s.e.m.) and decrease of 13±11% (Fig.2d, Fig.S2b), upon PH they raised early  
119 and remained elevated by about 70% until ~2.8d post PH as compared to untreated mice (Fig.2d).  
120 Overall, the expansion of the BC network during regeneration is associated with a concomitant  
121 increase in apical F-actin and pMLC levels, i.e. acto-myosin contractility.

122

#### 123 **BC network expansion correlates with YAP activation and proliferation during regeneration**

124 The actin cytoskeleton converts mechanical forces into biochemical signals. Since the Hippo pathway  
125 is a prominent mechano-sensor downstream of the actin cytoskeleton and can be activated by BA  
126 (17), we hypothesize that it could sense BA indirectly, through their effects on the apical acto-myosin  
127 system of hepatocytes, and drive their proliferation. To test whether YAP can sense BC network  
128 alterations, we examined its spatio-temporal dynamics using a specific antibody, validated by loss of  
129 signal upon YAP KO (Fig.S3). We correlated YAP nuclear localization, as readout for its activity (31,32),  
130 with hepatocyte proliferation, detected by the cell cycle marker PCNA. To account for previously

131 reported spatial heterogeneities of proliferation within the liver lobule (33), we imaged the entire CV-  
132 PV axis at 17 time points (0.5-7d) during regeneration (Fig.3a, b) and upon sham-surgery (Fig.S4a, b).  
133 Consistent with earlier reports (34), YAP was highly expressed in cholangiocytes but at low levels in  
134 hepatocytes in the livers of untreated mice (Fig.3a). In hepatocytes, the signal was primarily cytosolic,  
135 as expected for non-proliferating cells (35). During regeneration, however, YAP levels increased in  
136 hepatocytes as compared to untreated and sham-operated livers as determined by both IF (Fig.3a,  
137 Fig.S4a) and Western blot analysis (Fig.S4c). The major fraction of YAP was still cytoplasmic but, in  
138 addition, it was also detectable in nuclei of proliferating hepatocytes (Fig.3b, Fig.S4b). Quantification  
139 of nuclear YAP and PCNA levels showed that nuclear YAP was specific to regenerating livers compared  
140 to sham-operated or untreated mice (Fig.3c). It started as an immediate response to liver resection,  
141 as early as 0.5d post PH, ceased with the proliferative wave at about 3-4d (Fig.3c), and occurred  
142 throughout the entire CV-PV axis (Fig.3d). These spatio-temporal dynamics remarkably correlate with  
143 those of BC network expansion (see Fig.1b). Interestingly, we found that YAP was enriched at the  
144 apical plasma membrane of hepatocytes in regenerating liver (Fig.3e). The apical localization was  
145 detectable throughout the CV-PV axis, both in PCNA-positive and negative hepatocytes, and was  
146 specific to regenerating liver as compared to untreated and sham operated mice (Fig.S5a). Also, YAP  
147 displayed a particulate staining, suggesting that it may be spatially concentrated, e.g. on the actin  
148 cytoskeleton and/or organelles underneath the apical membrane (Fig.3e). This suggests that the apical  
149 localization and activation of YAP may be linked to the alterations of the BC network.

150

#### 151 **YAP localizes to apical F-actin enriched areas of hepatocytes during regeneration**

152 To verify the apical localization of YAP, we visualized it by immunogold labelling and electron  
153 microscopy (EM) at 1.5d and 1.8d post PH (Fig.4a). Consistent with the IF, YAP was enriched at  
154 microvilli and in the sub-apical region of hepatocytes (Fig.4a') as compared to the basolateral area  
155 (Fig.4a''). To quantify the enrichment, we determined YAP density at the apical and basolateral  
156 membrane of hepatocytes from EM images (6x6 images, ~30x30 $\mu$ m) (Fig.S5b). The density of  
157 immunogold particles was on average 4.2-fold higher in the apical than the basolateral region  
158 (Fig.S5c), demonstrating that YAP is enriched at the apical compartment during regeneration.

159 YAP is a mechano-sensor that responds to alterations of the actin cytoskeleton (36). From this  
160 perspective, its localization to the apical region of hepatocytes is ideal to sense alterations of biliary  
161 fluid dynamics and BC network expansion through changes of the acto-myosin system. As a pre-  
162 requisite, YAP should be enriched in areas of high F-actin content. To test for this, we used correlative

163 light EM (CLEM) on liver tissue sections at 1.8d post PH (Fig.4b, c). F-actin was imaged at 186nm  
164 resolution to identify F-actin-rich areas, whereas YAP was imaged at 1.1-2.6nm resolution to visualize  
165 immunogold labelling. YAP was particularly enriched in the F-actin-dense sub-apical region (Fig.4c',  
166 c'', high F-actin levels; Fig.4c''', low F-actin level, see also Fig.S6). Gold particles were often associated  
167 with the microvilli in the BC, supporting the idea that YAP associates with the apical actin cytoskeleton.  
168 These results provide the first IF and EM detection of YAP at the apical compartment of hepatocytes  
169 *in vivo* and provide support to the idea that the actin-dependent mechano-sensory function of Hippo  
170 may link BA metabolism to growth control during liver regeneration.

171

### 172 **Bile acid-induced activation of YAP is dependent on the acto-myosin system**

173 Given that YAP localizes to apical F-actin-rich areas in hepatocytes of regenerative liver, we  
174 hypothesized that BA may activate YAP through modulation of the acto-myosin system. We tested  
175 this idea on primary mouse hepatocytes. When cultured in collagen sandwich, these cells re-polarize  
176 forming BC *in vitro* (37) and exhibit a cholestatic-like phenotype (38), mimicking aspects of the  
177 metabolic state of the regenerative liver. Remarkably, YAP was not only cytoplasmic but also enriched  
178 at the apical region of the hepatocytes *in vitro* (Fig. 5a, upper left), as observed during regeneration *in*  
179 *vivo* (see Fig.3e and Fig.4). To recapitulate more closely the state of hepatocytes in the regenerating  
180 liver, we added the BA deoxycholic acid (DCA) at 200 $\mu$ M (Fig.5a, lower left), a concentration that is  
181 comparable to serum levels in mice after PH (39). DCA was sufficient to stimulate YAP nuclear  
182 translocation (1.7-fold increase as compared to DMSO control cells, Fig.5b), consistent with earlier  
183 observations (17). DCA also induced a strong dilation of BC (Fig.5a, compare Control vs. DCA), and up-  
184 regulation of YAP (Fig.S7a), as observed during regeneration *in vivo* (Fig.S4c). Thus, the *in vitro* system  
185 recapitulates properties of hepatocytes in the regenerating liver and, thus, proves suitable for  
186 studying YAP regulation.

187 We hypothesize that the stimulation of YAP nuclear translocation by DCA may be mediated by an  
188 actin-dependent mechano-sensory function. A test is whether inhibition of acto-myosin contractility  
189 abrogates the stimulatory effect by DCA on YAP nuclear translocation. Incubation of hepatocytes with  
190 the Rho kinase inhibitor Y27 blocked the activation of YAP (Fig.5a, lower right) and reduced the effect  
191 of DCA by 47% (Fig.5b). To confirm that DCA acts via the acto-myosin system, we analyzed pMLC levels  
192 in primary hepatocytes upon BA treatment by immuno-blot analysis (Fig.5c). DCA increased pMLC  
193 levels 1.57-fold as compared to untreated cells and Y27 blocked this induction (Fig.5c, Fig. S7b). This  
194 supports the hypothesis that YAP senses BA through an acto-myosin-dependent mechanism.

195 YAP is sensitive to perturbations of most actin cytoskeleton processes, including e.g. actin nucleation,  
196 polymerization and contractility (36,40). To verify that YAP specifically responds to alterations of acto-  
197 myosin contractility, but not to general perturbations of the actin cytoskeleton, we compared the  
198 effects of a set of small molecule inhibitors targeting distinct actin properties, (i) acto-myosin  
199 contractility using the Rho kinase inhibitors Y27 and Fasudil, (ii) actin nucleation and branching with  
200 the Arp2/3 inhibitor CK666 and the formin inhibitor SMIFH2, and (iii) F-actin polymerization using  
201 Latrunculin A and Cytochalasin D (Fig.5d). With the exception of Fasudil, which significantly reduced  
202 nuclear YAP levels as Y27, all actin inhibitors induced nuclear YAP translocation (Fig.5e), mimicking the  
203 effect of DCA.

204 If YAP senses contractility, as hypothesized, YAP-activating compounds should also induce  
205 contractility. Quantification of pMLC levels of hepatocytes treated with the actin inhibitors confirmed  
206 this (Fig.5f, Fig.S7c). As expected, Y27 and Fasudil reduced pMLC levels in comparison to the control.  
207 In contrast, the actin nucleation inhibitor CK666 and the polymerization inhibitors Cytochalasin D and  
208 Latrunculin A increased pMLC levels. Cytochalasin D and Latrunculin A, which caused a pronounced  
209 activation of YAP (see Fig.5e), produced the strongest increase in pMLC levels as compared to control  
210 cells (2.1-3.0-fold increase, Fig.S7c). Altogether, our *in vivo* and *in vitro* results suggest that YAP senses  
211 BA overload through changes of BC network structure via the acto-myosin-dependent regulation of  
212 the Hippo pathway.

213

#### 214 **YAP is regulated by the acto-myosin system during regeneration**

215 To validate our findings *in vivo*, we tested the effect of rho kinase inhibition on YAP activity during liver  
216 regeneration. We chose Fasudil, which efficiently inhibits BC contractility and bile flow *in vivo* (18) and  
217 proved to be the most potent inhibitor of MLC phosphorylation in hepatocytes *in vitro* (see Fig.S7c).  
218 Fasudil was applied by intraperitoneal injection to mice at 2d post PH or sham operation for 1 h. First,  
219 we verified the effect of Fasudil on acto-myosin activity by measuring BC diameter (Fig.6a). Spatial  
220 analysis of BC diameter showed that Fasudil strongly dilated the BC diameter in mice after PH (15.6%,  
221 zone 18) and moderately in the liver of sham OP mice (9.3%, zone 15; Fig.6b). This is consistent with  
222 the higher BC acto-myosin activity in the regenerating than control liver (Fig.2). Next, we tested the  
223 effect of Fasudil on nuclear YAP levels during regeneration (Fig.6c). Fasudil reduced nuclear YAP levels  
224 during regeneration by up to 52% as compared to control mice (Fig.6d, red lines). Note that the sham  
225 operation alone caused a small increase in nuclear YAP levels that was also reduced by Fasudil (Fig.6d,

226 green lines). The results argue that YAP is indeed activated by acto-myosin activity during  
227 regeneration.

228

229 **A mechanistic model predicts a switch-like activation of YAP upon mechanical stimulation during**  
230 **regeneration**

231 Large and sustained increases in BA loads, as after PH, stimulate liver re-growth (9). In contrast,  
232 moderate fluctuations of BA concentrations, resulting e.g. from circadian rhythm or diet (41,42), can  
233 be buffered by the metabolic activity of hepatocytes and do not result in YAP activation and a  
234 proliferative response. This raises the question of how YAP can discriminate between physiological  
235 changes in BA loads and pressure in the BC versus those that require cell proliferation.

236 Bile flow through bile canaliculi is driven by both the osmotic pressure of actively pumped bile salts  
237 and osmolytes, and contractility of BC (18,27). Upon PH without removal of the gall bladder, the total  
238 bile salt pool in the body is only marginally reduced, since intra-hepatic BA account for 2-4% of the  
239 total pool (43). Therefore, the liver remnant needs to transport the full bile salt pool through a reduced  
240 BC network, leading to an increased bile salt flux per liver weight (44) and, consequently, increased  
241 osmotic pressure and acto-myosin tension in the BC. It is currently technically impossible to measure  
242 pressure within the BC. However, it is possible to predict the changes in apical cortical tension and  
243 couple these to YAP nuclear translocation using a theoretical approach. Based on our experimentally  
244 measured spatial profile of BC diameter (see Fig.1b), we developed a biophysical model (see  
245 Supplemental Experimental Procedures) that predicts the apical cortical tension during regeneration  
246 from the osmotic pressure within the BC network. The model predicts a ~2-fold increase of apical  
247 tension throughout the entire CV-PV axis (Fig.S8a) as an immediate response to liver resection within  
248 0.8d. Comparison of the inferred cortical tension and our experimentally measured apical pMLC levels  
249 shows a high correlation (Pearson correlation  $r=0.94$ , Fig.S8b), supporting the predictive power of the  
250 model.

251 Next, we coupled the biophysical model with a biochemical model of YAP regulation to predict nuclear  
252 YAP levels from cortical tension. Based on reports on the regulation of YAP in the liver (11,13,45), we  
253 considered five regulatory mechanisms: YAP synthesis, degradation, phosphorylation, cytoplasmic  
254 sequestration as well as nuclear-cytoplasmic shuttling (Fig.7a). Assuming simple mass action and  
255 Michaelis-Menten kinetics for the considered reactions (see Fig.7a), the model has 16 parameters. Of  
256 these, the compartment volumes of hepatocyte nuclei and cytoplasm were experimentally measured  
257 (19) (see Table S2). Five parameters were set to the value 1, as the analytical analysis of the model



258 revealed that they do not affect the steady state solution. The remaining 9 parameters were estimated  
259 by fitting the quasi steady state solution of the model to 120 data points (nuclear and total YAP  
260 measurements; for details see Supplemental Experimental Procedures and Table S2). To test the  
261 model, we predicted the nuclear and total YAP levels from the estimated apical cortical tension and  
262 compared the results to our experimental measurements (Fig.S8c, d). Despite its relative simplicity,  
263 our mechanistic model reproduced the experimentally determined values of nuclear and total YAP  
264 levels over the time course of regeneration.

265 Finally, we used the model to infer the stimulus-response behavior, by analyzing YAP translocation to  
266 the nucleus as a function of BC cortical tension. The resulting stimulus-response curve (Fig.7b, black  
267 curve) is robust to changes of the kinetic rate constants. The nuclear YAP measured values match the  
268 theoretical curve very well (Fig.7b, colored symbols). The stimulus-response curve reveals a sharp  
269 threshold-like sigmoidal dependency where YAP translocates into the nucleus only if the relative apical  
270 cortical tension exceeds  $\sim 1.75$ -fold (Fig.7b). This suggests that low and moderate fluctuations of BA  
271 load and cortical tension (e.g. diet-triggered) are tolerated and do not trigger the Hippo pathway. In  
272 contrast, severe alterations of biliary pressure, such as after PH, robustly activate YAP in a switch-like  
273 manner to induce regeneration. Our model therefore predicts the existence of a threshold in the  
274 activation of YAP to ensure a switch from a non-proliferative to a proliferative response.

275

## 276 **Discussion**

277 We described a novel mechanism whereby hepatocytes detect organ size during liver regeneration  
278 based on mechano-sensing of metabolic load through the apical acto-myosin system (Fig.7c). We  
279 demonstrate that liver resection induces structural and functional changes of the BC network,  
280 including expansion of the apical surface of hepatocytes and increase in acto-myosin contractility.  
281 These changes occur as a compensatory response to BA overload induced by tissue resection, and are  
282 sensed by YAP, which is enriched at the apical domain of hepatocytes and translocates to the nucleus  
283 dependent on the activity of the apical acto-myosin system. During regeneration, the restoration of  
284 the liver-to-body weight ratio also re-establishes the metabolic homeostasis, the structure of the BC  
285 network reverts to normal, and YAP returns to its physiological state (cytoplasmic localization). Thus,  
286 the BC network represents a self-regulatory mechano-sensory system that adapts to the overall  
287 metabolic demand of the body and acts as readout of tissue status.

288 The function of BA as regulators of liver regeneration has been demonstrated early on, and mainly  
289 attributed to their signaling function via nuclear receptors (9). BA metabolism is a common target in

290 clinical practice for treatment of a variety of human diseases to promote liver function. Whereas  
291 elevated BA levels promote hepatocyte proliferation, deprivation of BA results in a regenerative delay  
292 (9). However, besides signal messengers, BA are also regulators of the Hippo pathway, suggesting the  
293 existence of an additional mechanism (17). Our results implicate the BC network in such a mechanism,  
294 by playing a mechano-sensory role, linking BA metabolism, liver tissue structure and Hippo signaling.  
295 A remarkable feature of liver tissue organization is that all hepatocytes are connected via the BC,  
296 bridging the sub-cellular to the tissue level. Such organization permits the communication of global  
297 tissue properties, e.g. metabolic status, to each individual cell within the lobule, to control cell  
298 behavior collectively. Key for the signaling function of the BC network is the dynamic nature of the  
299 apical plasma membrane of hepatocytes, which can promptly respond to metabolic changes. Bile  
300 pressure forms a gradient within the lobule varying ~ 30-fold from the CV to the PV area (18). Such  
301 variation needs to be balanced by the tension of the acto-myosin system. This implies that changes of  
302 pressure need to be sensed, evoking the need for a mechanosensory system. The same system may  
303 conceivably operate during liver regeneration.

304 Our mathematical model predicts a sharp pressure-dependent threshold in the activation of YAP to  
305 ensure a robust switch from a non-proliferative to a proliferative response to the metabolic overload.  
306 This means that fluctuations of BA concentrations in the physiological range could be compensated  
307 by the metabolic activity of hepatocytes, whereas large and sustained changes, as after PH, trigger the  
308 Hippo pathway in a switch-like manner to induce regeneration. Our mechanistic mathematical model  
309 of signal transduction through the Hippo pathway triggered by a mechanical stimulus may be  
310 applicable to organ size control more generally, e.g. growth of the fly wing imaginal disc in response  
311 to apical membrane tension (46).

312 A wide array of apical actin interacting and polarity or cell-junction proteins have already been  
313 reported to regulate the Hippo pathway (16,47). All these molecules are potential YAP regulators  
314 during liver regeneration. Given the collective properties of the apical plasma membrane and  
315 associated acto-myosin cytoskeleton, a systems analysis of its complex super-molecular network will  
316 be required to identify the precise underlying molecular mechanisms.

317

## 318 **Experimental Procedures**

### 319 **Animal work**

320 Animal experiments were performed on 8-12 weeks old, male, C57BL/6J01aHsd (Harlan laboratories)  
321 mice at the MPI-CBG (Dresden, Germany). PH and BDL experiments were performed between ~ 8am

322 – 1pm. Experiments were conducted in accordance with German animal welfare legislation and in  
323 strict pathogen-free conditions in the animal facility of the MPI-CBG. Protocols were approved by the  
324 Institutional Animal Welfare Officer (Tierschutzbeauftragter) and all necessary licenses were obtained  
325 from the regional Ethical Commission for Animal Experimentation of Dresden, Germany  
326 (Tierversuchskommission, Landesdirektion Dresden). Mice were fasted 6h prior sacrifice (water ad  
327 libitum).

#### 328 **PH**

329 PH was performed based on (20) but without removal of the gall bladder (left and right median lobes  
330 resected individually). Sham operated mice received the same treatment but without liver resection.

#### 331 **YAP knockout**

332 A conditional-hepatocyte specific mosaic YAP knockout was induced by adeno-associated virus  
333 mediated expression of iCre recombinase using AAV/DJ-pALB(1.9)-iCre (Vector biolabs, USA) in YAP<sup>fl/fl</sup>  
334 mice (21). AAV/DJ-pALB(1.9)-eGFP (Vector biolabs, USA) served as control.

#### 335 **Fasudil administration**

336 Mice received 30mg/kg Fasudil or saline intravenously and were sacrificed 1h after.

#### 337 **Bile duct ligation**

338 BDL was performed as described in (22) and sacrificed 1d post-surgery. Sham operated mice received  
339 the same treatment without BDL.

#### 340 **Tissue fixation**

341 Anaesthetized mice were perfused transcardially with 4% PFA/0.1% Tween20/PBS. Tissue was post-  
342 fixed in 4% PFA/0.1% Tween20/PBS for ~48h at 4°C for IF or in 1% glutaraldehyde/3% PFA/PBS for 1.5h  
343 for morphological EM.

#### 344 **Primary hepatocytes**

345 Hepatocytes were isolated and cultures as described in (23) and (24), respectively. Cells were treated  
346 with 20µM Y27, Fasudil, SMIFH2, CK666 or 5µM Latrunculin A or Cytochalasin D for 6h. For BA  
347 experiments, cells were pre-incubated with 20µM Y27 or DMSO (control) for 1 h, followed by 16-18h  
348 incubation with DMSO, 200µM DCA, 20µM Y27 or 20µM + 200µM DCA. Cells were lysed for  
349 biochemical analysis or fixed with 4% PFA for 30min.

#### 350 **IF stainings**

351 100µm liver slices were permeabilized with 0.5% TritonX100 for 1h, quenched with 10 mM NH<sub>4</sub>Cl for  
352 30min, blocked with 0.2% gelatin/300mM NaCl/0.3% TX100/PBS and incubated with primary (Table  
353 S1) and fluorescently-conjugated secondary antibody in blocking buffer for 48h each. Co-staining of  
354 CD13 with PCNA and YAP or pMLC required additional antigen retrieval in citric acid or EDTA buffer at  
355 80°C for 1h, respectively. To preserve CD13 staining during retrieval, tissue was pre-fixed with 4% PFA  
356 for 20min. Following retrieval, sections were stained with primary antibodies (Table S1) as described  
357 above. Sections were mounted in 90% glycerol (2D microscopy) or cleared with SeeDB (3D imaging)  
358 as previously described (25). IF staining of hepatocytes was performed as described previously (24).

### 359 **Microscopy**

360 Samples were imaged on a Zeiss LSM780 confocal microscope as 2x1 image tiles covering an entire  
361 CV-PV axis as single plane image or 30 µm z-stacks (voxel size of 0.28 x 0.28 x 0.3µm) as described in  
362 (18,19).

### 363 **Western blot**

364 SDS-PAGE separated liver lysates were transferred onto nitrocellulose membrane. Proteins were  
365 immune-detected (Table S1) using chemiluminescence. The relative density of bands was quantified  
366 using the Fiji software.

### 367 **EM**

368 For morphological EM, 70 nm liver sections were imaged as 10x10 grids (image size 19x19µm, pixel  
369 size 9nm) on a Philips Tecnai12 EM (FEI, USA). For immuno-EM, sections were immunolabelled using  
370 YAP antibody (Table S1) and goat-anti-rabbit-10nm gold coupled IgG as previously described (26) and  
371 imaged at 1.1-2.6nm resolution. For CLEM, sections were additionally incubated with Alexa Fluor488-  
372 conjugated phalloidin and imaged at 0.186 µm/pixel resolution on a Zeiss Axioplan2 light-microscope.

### 373 **Image analysis and mathematical modeling**

374 See supplemental experimental procedures.

375

### 376 **Acknowledgements**

377 We thank the Biomedical Services (Jussi Helppi, Anne-Muench Wuttke and Barbara Langen), Light  
378 Microscopy Facility (Jan Peychl), Electron Microscopy Facility (Jean-Marc Verbavatz) of the MPI-CBG  
379 and the Centre for Information Services and High Performance Computing (ZIH) of the TU Dresden for  
380 the generous provision of computing power.

381

## 382 **Author Contributions**

383 K.M. and M.Z. conceived the project and K.M. designed most of the experimental strategy. K.M., with  
384 help of S.S., conducted the experiments. M.W.-B. performed immuno-EM and CLEM. U.D. trained K.M.  
385 in PH. H.M.-N and Y.K. developed the image analysis algorithms. E.M.T provided the YAP antibody, a  
386 key reagent for the study. L.B. and Y.K. developed and analyzed the mathematical model. K.M. and  
387 M.Z. wrote the manuscript.

388

## 389 **Financial Support**

390 This work was financially supported by the Virtual Liver (<http://www.virtual-liver.de>, grant #315757),  
391 Liver Systems Medicine (LiSyM, grant #031L0038), DYNAFLOW (grant #031L008A to L.B. and M.Z.)  
392 initiatives, funded by the German Federal Ministry of Research and Education (BMBF), the BMBF grant  
393 on “a systems microscopy approach to tissues and organ formation” (grant #031L0044), the European  
394 Research Council (grant #695646), and the Max Planck Society (MPG).

395

## 396 **Declaration of Interests**

397 The authors declare no competing interests.

398

## 399 **References**

- 400 1. Nelson CM, Jean RP, Tan JL, Liu WF, Sniadecki NJ, Spector AA, et al. Emergent patterns of  
401 growth controlled by multicellular form and mechanics. *Proc. Natl. Acad. Sci.*  
402 2005;102:11594–11599.
- 403 2. Engler AJ, Sen S, Sweeney HL, Discher DE. Matrix Elasticity Directs Stem Cell Lineage  
404 Specification. *Cell.* 2006;126:677–689.
- 405 3. Farhadifar R, Röper JC, Aigouy B, Eaton S, Jülicher F. The Influence of Cell Mechanics, Cell-Cell  
406 Interactions, and Proliferation on Epithelial Packing. *Curr. Biol.* 2007;17:2095–2104.

- 407 4. Rauzi M, Verant P, Lecuit T, Lenne P-F. Nature and anisotropy of cortical forces orienting  
408 *Drosophila* tissue morphogenesis. *Nat. Cell Biol.* 2008;10:1401–1410.
- 409 5. Connelly JT, Gautrot JE, Trappmann B, Tan DW-M, Donati G, Huck WTS, et al. Actin and serum  
410 response factor transduce physical cues from the microenvironment to regulate epidermal  
411 stem cell fate decisions. *Nat. Cell Biol.* 2010;12:711–718.
- 412 6. Allieux-Guérin M, Icard-Arcizet D, Durieux C, Hénon S, Gallet F, Mevel J-C, et al.  
413 Spatiotemporal Analysis of Cell Response to a Rigidity Gradient: A Quantitative Study Using  
414 Multiple Optical Tweezers. *Biophys. J.* 2009;96:238–247.
- 415 7. Boxenbaum H. Interspecies variation in liver weight, hepatic blood flow, and antipyrine  
416 intrinsic clearance: Extrapolation of data to benzodiazepines and phenytoin. *J.*  
417 *Pharmacokinet. Biopharm.* 1980;8:165–176.
- 418 8. Higgins GM, Anderson RM. Experimental pathology of liver: Restoration of liver of white rat  
419 following partial surgical removal. *Arch Pathol.* 1931;12:186–202.
- 420 9. Huang W, Ma K, Zhang J, Qatanani, Mohammed, Cuvillier J, Liu J, Dong B, et al. Nuclear  
421 Receptor-Dependent Bile Acid Signaling Is Required for Normal Liver Regeneration. *Science.*  
422 2006;312:233–236.
- 423 10. Natarajan A, Wagner B, Sibilina M. The EGF receptor is required for efficient liver regeneration.  
424 *Proc. Natl. Acad. Sci.* 2007;104:17081–17086.
- 425 11. Lu L, Finegold MJ, Johnson RL. Hippo pathway coactivators Yap and Taz are required to  
426 coordinate mammalian liver regeneration. *Exp. Mol. Med.* 2018;50:e423.
- 427 12. Lofrese G, Malinka T, Keogh A, Baier F, Simillion C, Montani M, et al. Impaired liver  
428 regeneration in aged mice can be rescued by silencing Hippo core kinases MST1 and MST2.  
429 *EMBO Mol. Med.* 2016;9:1–15.
- 430 13. Grijalva JL, Huizenga M, Mueller K, Rodriguez S, Brazzo J, Camargo F, et al. Dynamic  
431 alterations in Hippo signaling pathway and YAP activation during liver regeneration. *Am. J.*  
432 *Physiol. - Gastrointest. Liver Physiol.* 2014;307:G196–G204.
- 433 14. Aragona M, Panciera T, Manfrin A, Giullitti S, Michielin F, Elvassore N, et al. A mechanical  
434 checkpoint controls multicellular growth through YAP/TAZ regulation by actin-processing  
435 factors. *Cell.* 2013;154:1047–1059.

- 436 15. Yang C-C, Graves HK, Moya IM, Tao C, Hamaratoglu F, Gladden AB, et al. Differential  
437 regulation of the Hippo pathway by adherens junctions and apical–basal cell polarity  
438 modules. *Proc. Natl. Acad. Sci.* 2015;112:1785–1790.
- 439 16. Chen C-L, Gajewski KM, Hamaratoglu F, Bossuyt W, Sansores-Garcia L, Tao C, et al. The apical-  
440 basal cell polarity determinant Crumbs regulates Hippo signaling in *Drosophila*. *Proc. Natl.*  
441 *Acad. Sci.* 2010;107:15810–15815.
- 442 17. Anakk S, Bhosale M, Schmidt VA, Johnson RL, Finegold MJ, Moore DD. Bile Acids Activate YAP  
443 to Promote Liver Carcinogenesis. *Cell Rep.* 2013;5:1060–1069.
- 444 18. Meyer K, Ostrenko O, Bourantas G, Morales-Navarrete H, Porat-Shliom N, Segovia-Miranda F,  
445 et al. A Predictive 3D Multi-Scale Model of Biliary Fluid Dynamics in the Liver Lobule. *Cell Syst.*  
446 2017;4:277-290.e9.
- 447 19. Morales-Navarrete H, Segovia-Miranda F, Klukowski P, Meyer K, Nonaka H, Marsico G, et al. A  
448 versatile pipeline for the multi-scale digital reconstruction and quantitative analysis of 3D  
449 tissue architecture. *eLife.* 2015;4:1–29.
- 450 20. Mitchell C, Willenbring H. A reproducible and well-tolerated method for 2/3 partial  
451 hepatectomy in mice. *Nat. Protoc.* 2008;3:1167–1170.
- 452 21. Zhang N, Bai H, David KK, Dong J, Zheng Y, Cai J, et al. The Merlin/NF2 Tumor Suppressor  
453 Functions through the YAP Oncoprotein to Regulate Tissue Homeostasis in Mammals. *Dev.*  
454 *Cell.* 2010;19:27–38.
- 455 22. Tag CG, Sauer-Lehnen S, Weiskirchen S, Borkham-Kamphorst E, Tolba RH, Tacke F, et al. Bile  
456 Duct Ligation in Mice: Induction of Inflammatory Liver Injury and Fibrosis by Obstructive  
457 Cholestasis. *J. Vis. Exp.* 2015;1–11.
- 458 23. Godoy P, Hewitt NJ, Albrecht U, Andersen ME, Ansari N, Bhattacharya S, et al. Recent  
459 advances in 2D and 3D in vitro systems using primary hepatocytes, alternative hepatocyte  
460 sources and non-parenchymal liver cells and their use in investigating mechanisms of  
461 hepatotoxicity, cell signaling and ADME. *Arch. Toxicol.* 2013;87:1315–1530.
- 462 24. Zeigerer A, Wuttke A, Marsico G, Seifert S, Kalaidzidis Y, Zerial M. Functional properties of  
463 hepatocytes in vitro are correlated with cell polarity maintenance. *Exp. Cell Res.*  
464 2017;350:242–252.

- 465 25. Ke M-T, Fujimoto S, Imai T. SeeDB: a simple and morphology-preserving optical clearing agent  
466 for neuronal circuit reconstruction. *Nat. Neurosci.* 2013;16:1154–1161.
- 467 26. Paridaen JTML, Huttner WB, Wilsch-Bräuning M. Analysis of primary cilia in the developing  
468 mouse brain. *Methods Cell Biol.* 2015;127:93–129.
- 469 27. Watanabe N, Tsukada N, Smith CR, Phillips JM. Motility of bile canaliculi in the living animal:  
470 Implications for bile flow. *J. Cell Biol.* 1991;113:1069–1080.
- 471 28. Zou Y, Bao Q, Kumar S, Hu M, Wang GY, Dai G. Four waves of hepatocyte proliferation linked  
472 with three waves of hepatic fat accumulation during partial hepatectomy-induced liver  
473 regeneration. *PLoS ONE.* 2012;7.
- 474 29. Péan N, Doignon I, Garcin I, Besnard A, Julien B, Liu B, et al. The receptor TGR5 protects the  
475 liver from bile acid overload during liver regeneration in mice. *Hepatology.* 2013;58:1451–  
476 1460.
- 477 30. Georgiev P, Jochum W, Heinrich S, Jang JH, Nocito A, Dahm F, et al. Characterization of time-  
478 related changes after experimental bile duct ligation. *Br. J. Surg.* 2008;95:646–656.
- 479 31. Zhao B, Zhao B, Wei X, Wei X, Li W, Li W, et al. Inactivation of YAP oncoprotein by the Hippo  
480 pathway is involved in cell contact inhibition and tissue growth control. *Genes Dev.*  
481 2007;21:2747–2761.
- 482 32. Yagi R, Chen LF, Shigesada K, Murakami Y, Ito Y. A WW domain-containing Yes-associated  
483 protein (YAP) is a novel transcriptional co-activator. *EMBO J.* 1999;18:2551–2562.
- 484 33. Wu Y, Guo F, Liu J, Xiao X, Huang L, He D. Triple labeling with three thymidine analogs reveals  
485 a well-orchestrated regulation of hepatocyte proliferation during liver regeneration. *Hepatol.*  
486 *Res.* 2011;41:1230–1239.
- 487 34. Yimlamai D, Christodoulou C, Galli GG, Yanger K, Pepe-Mooney B, Gurung B, et al. Hippo  
488 pathway activity influences liver cell fate. *Cell.* 2014;157:1324–1338.
- 489 35. LaQuaglia MJ, Grijalva JL, Mueller KA, Perez-Atayde AR, Kim HB, Sadri-Vakili G, et al. YAP  
490 Subcellular Localization and Hippo Pathway Transcriptome Analysis in Pediatric  
491 Hepatocellular Carcinoma. *Sci. Rep. [Internet].* 2016 [cited 2019 Feb 23];6. Available from:  
492 <http://www.nature.com/articles/srep30238>



- 493 36. Dupont S, Morsut L, Aragona M, Enzo E, Giulitti S, Cordenonsi M, et al. Role of YAP/TAZ in  
494 mechanotransduction. *Nature*. 2011;474:179–83.
- 495 37. Zeigerer A, Wuttke A, Marsico G, Seifert S, Kalaidzidis Y, Zerial M. Functional properties of  
496 hepatocytes in vitro are correlated with cell polarity maintenance. *Exp. Cell Res.*  
497 2017;350:242–252.
- 498 38. Rippin JS, Hagenbuch B, Meier PJ, Stieger B. Cholestatic expression pattern of sinusoidal and  
499 canalicular organic anion transport systems in primary cultured rat hepatocytes. *Hepatology*.  
500 2001;33:776–782.
- 501 39. Naugler WE. Bile acid flux is necessary for normal liver regeneration. *PLoS ONE*. 2014;9:1–10.
- 502 40. Sansores-Garcia L, Bossuyt W, Wada K-I, Yonemura S, Tao C, Sasaki H, et al. Modulating F-  
503 actin organization induces organ growth by affecting the Hippo pathway. *EMBO J.*  
504 2011;30:2325–35.
- 505 41. Eggink HM, Oosterman JE, de Goede P, de Vries EM, Foppen E, Koehorst M, et al. Complex  
506 interaction between circadian rhythm and diet on bile acid homeostasis in male rats.  
507 *Chronobiol. Int.* 2017;00:1–15.
- 508 42. Ma K, Xiao R, Tseng HT, Shan L, Fu L, Moore DD. Circadian dysregulation disrupts bile acid  
509 homeostasis. *PLoS ONE*. 2009;4.
- 510 43. Setchell KDR, Rodrigues CMP, Clerici C, Solinas A, Morelli A, Gartung C, et al. Bile Acid  
511 Concentrations in Human and Rat Liver Tissue and in Hepatocyte Nuclei. *Gastroenterology*.  
512 1997;112:226–235.
- 513 44. Vos TA, Ros JE, Havinga R, Moshage H, Kuipers F, Jansen PL, et al. Regulation of hepatic  
514 transport systems involved in bile secretion during liver regeneration in rats: Regulation of  
515 Hepatic Transport Systems Involved in Bile Secretion During Liver Regeneration in Rats.  
516 *Hepatology*. 1999;29:1833–1839.
- 517 45. Loforese G, Malinka T, Keogh A, Baier F, Simillion C, Montani M, et al. Impaired liver  
518 regeneration in aged mice can be rescued by silencing Hippo core kinases MST1 and MST2.  
519 *EMBO Mol. Med.* 2016;9:1–15.
- 520 46. Pan Y, Heemskerk I, Ibar C, Shraiman BI, Irvine KD. Differential growth triggers mechanical  
521 feedback that elevates Hippo signaling. *Proc. Natl. Acad. Sci.* 2016;113:E6974–E6983.

- 522 47. Oka T, Remue E, Meerschaert K, Vanloo B, Boucherie C, Gfeller D, et al. Functional complexes  
523 between YAP2 and ZO-2 are PDZ domain-dependent, and regulate YAP2 nuclear localization  
524 and signalling. *Biochem. J.* 2010;432:461–478.

Figure 1

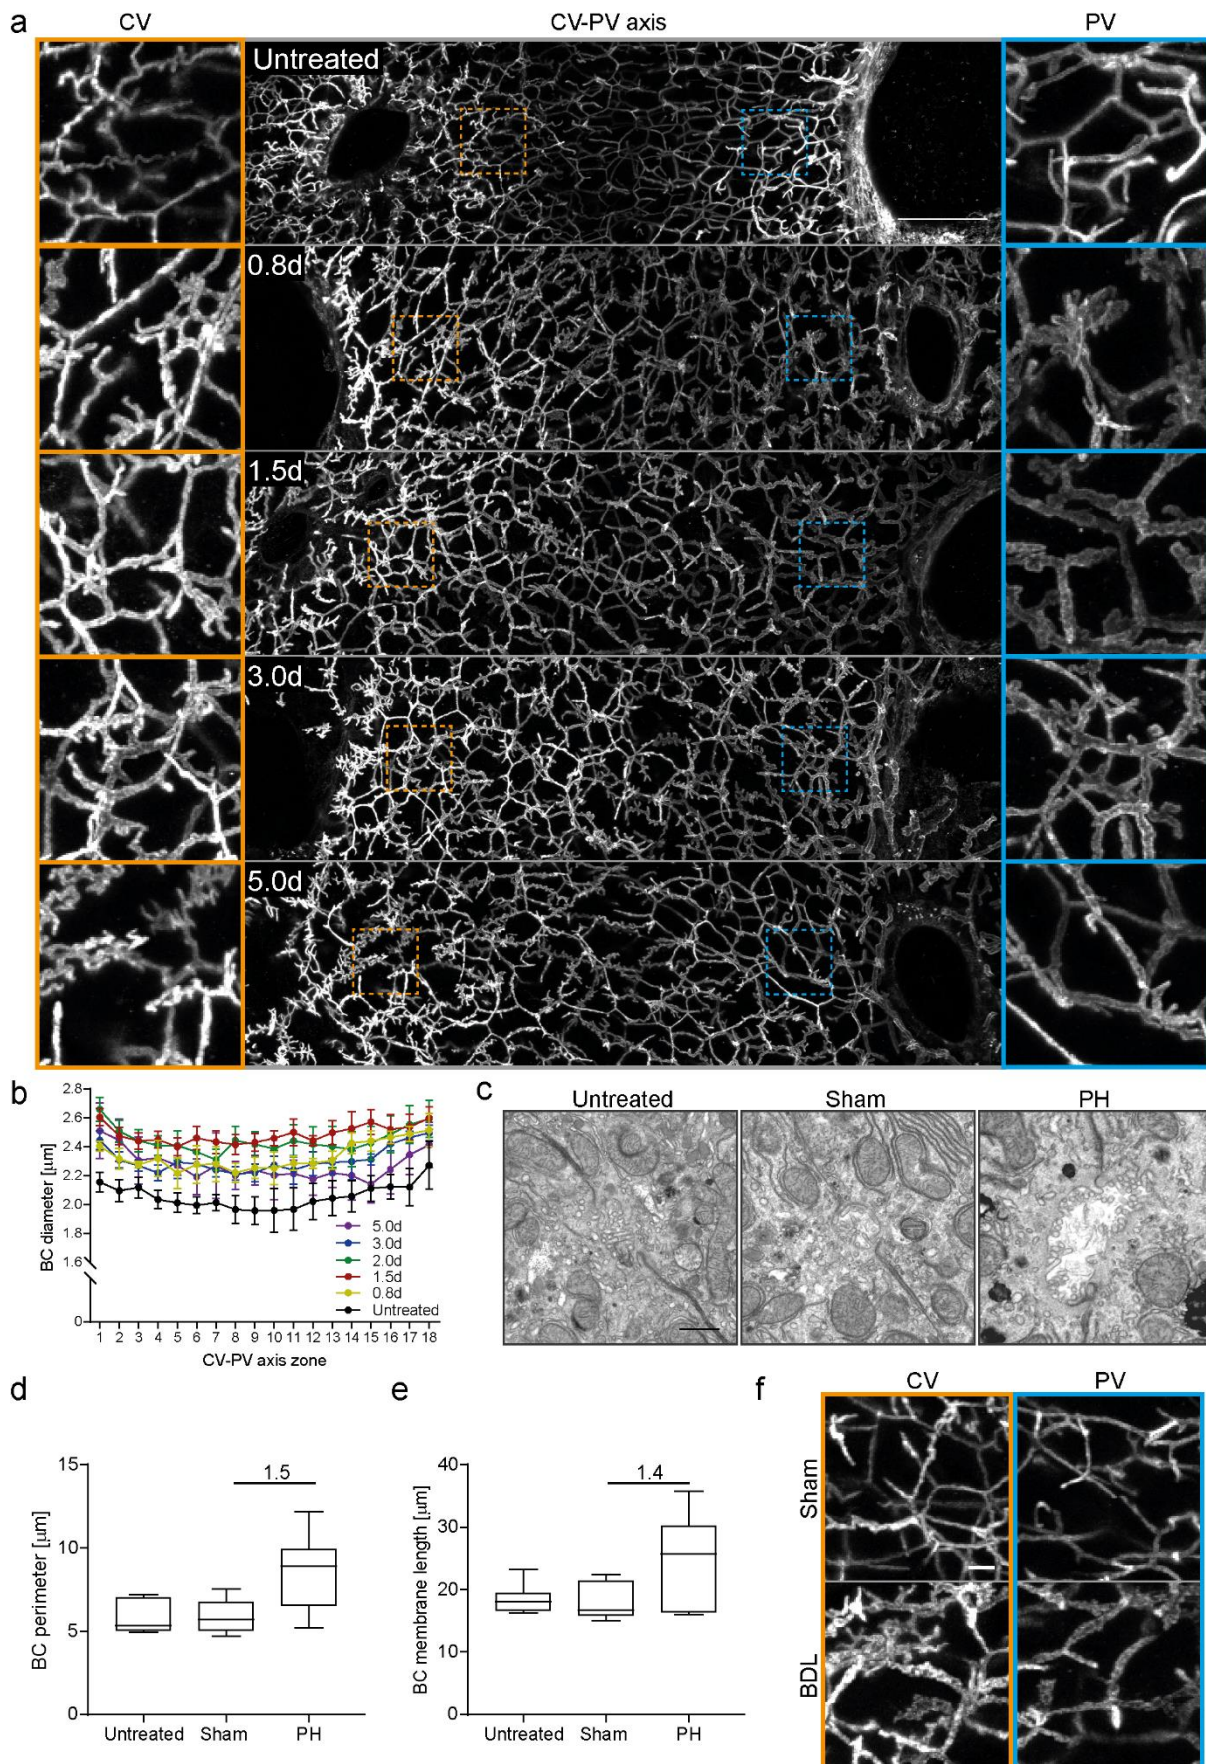

### Figure 1 The BC network transiently expands during liver regeneration

**a)** Fluorescence staining for the apical marker CD13 on liver tissue sections from untreated mice or animals at indicated time points post PH. Shown are maximum projections of 50  $\mu\text{m}$  z-stacks covering an entire CV-PV axis (CV, left; PV, right). Indicated regions of the CV (orange) and PV (blue) areas are shown as magnifications on the left and right, respectively. **b)** Quantification of BC diameter within 18 zones along the CV-PV axis (zone 1, peri-central; zone 18, peri-portal) in livers from untreated animals or mice at indicated timepoints post PH. The diameter was measured from 3D BC network reconstructions of IF image stacks of CD13 as shown in (a). The zones directly adjacent to the CV and PV were excluded from the analysis ( $\sim 1$  cell layer). Mean  $\pm$  s.e.m, n=3-6 mice per timepoint. BC diameter of untreated mice vs. 0.8 d, 1.5 d, 2.0 d, 3.0 d and 5.0 d post PH,  $p < 0.0001$ . **c)** EM images of BC on liver tissue sections of untreated mice (left) and 1.8 d post sham OP (middle) or PH (right). **d, e)** Quantification of BC perimeter (d) and total BC membrane length (e) from EM images as representatively shown in (c). Box-whisker plot with median, 25-75 quartiles and minimum/maximum error bars, n=5-6 mice per condition. In (d), BC perimeter of untreated vs. sham condition,  $p > 0.05$  (n.s.); Untreated vs. PH condition,  $p < 0.01$ . In (e), BC membrane length of untreated vs. sham condition,  $p > 0.05$  (n.s.); Untreated vs. PH condition,  $p < 0.05$ . **f)** IF stainings of the apical marker CD13 on liver tissue sections from livers at 1 d post sham OP or BDL. Shown are maximum projections of 50  $\mu\text{m}$  z-stacks in the CV (left, orange) and PV (right, blue) region. Images in (a) and (f) are background-subtracted. Scale bars, 50  $\mu\text{m}$  (a), 1  $\mu\text{m}$  (c), 5  $\mu\text{m}$  (f).

Figure 2

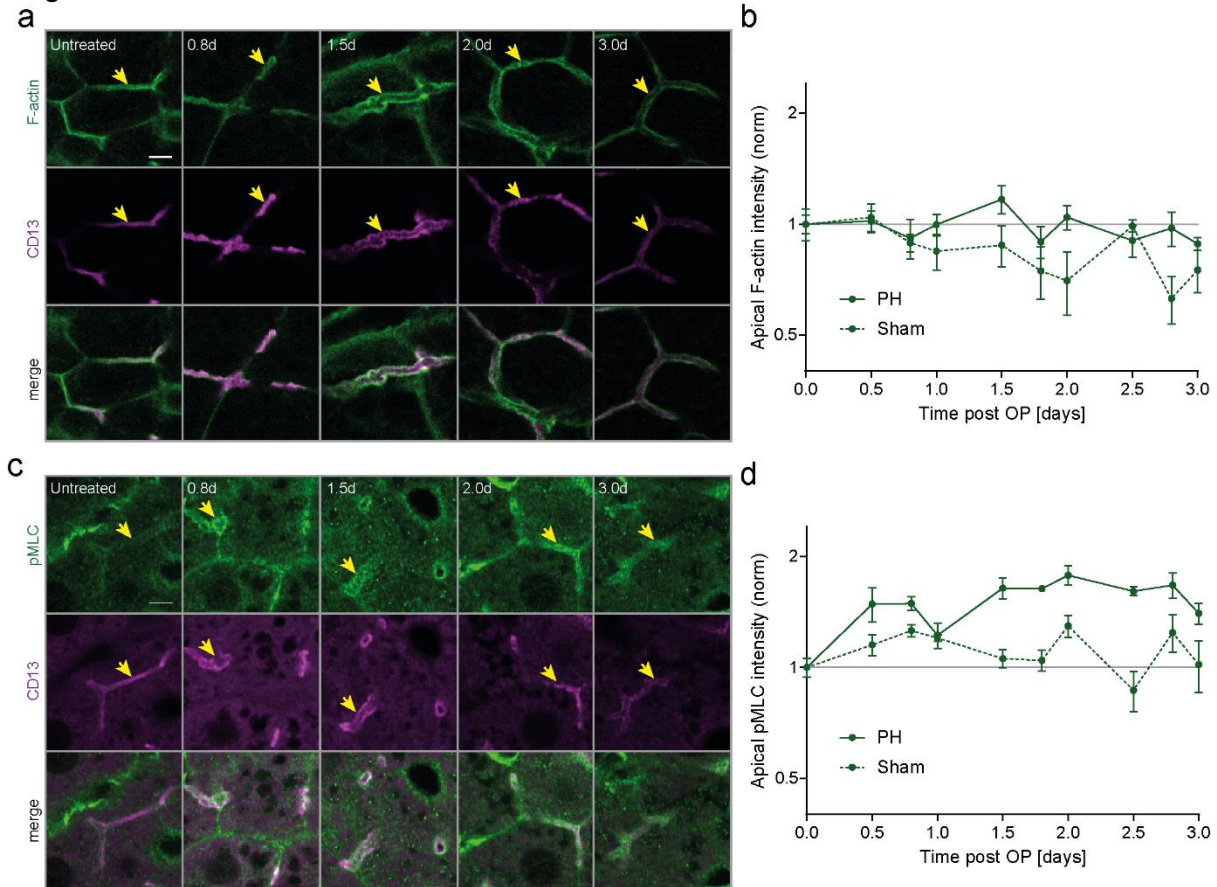

**Figure 2 BC network dilation is accompanied by increased apical myosin levels during regeneration**

**a, c**) Fluorescence stainings for F-actin (a) or pMLC (c) and the apical marker CD13 in the PV area on liver tissue sections from untreated mice or animals at indicated time points post PH. Arrows indicate BC. **b, d**) Quantification of apical F-actin (b) and pMLC (d) intensity from images as representatively shown in (a,c) as well as Fig.S2a,b, at indicated time points post PH (solid line) or sham OP (dashed line). Data is normalized to untreated animals (timepoint 0). Mean  $\pm$  s.e.m,  $n=3-5$  (b) and  $n=2-5$  (d) mice per timepoint. Apical F-actin of sham vs. PH time course,  $p < 0.05$ ; Apical pMLC of sham vs. PH time course,  $p < 0.005$ . Scale bar, 5  $\mu\text{m}$  (a,c).

Figure 3

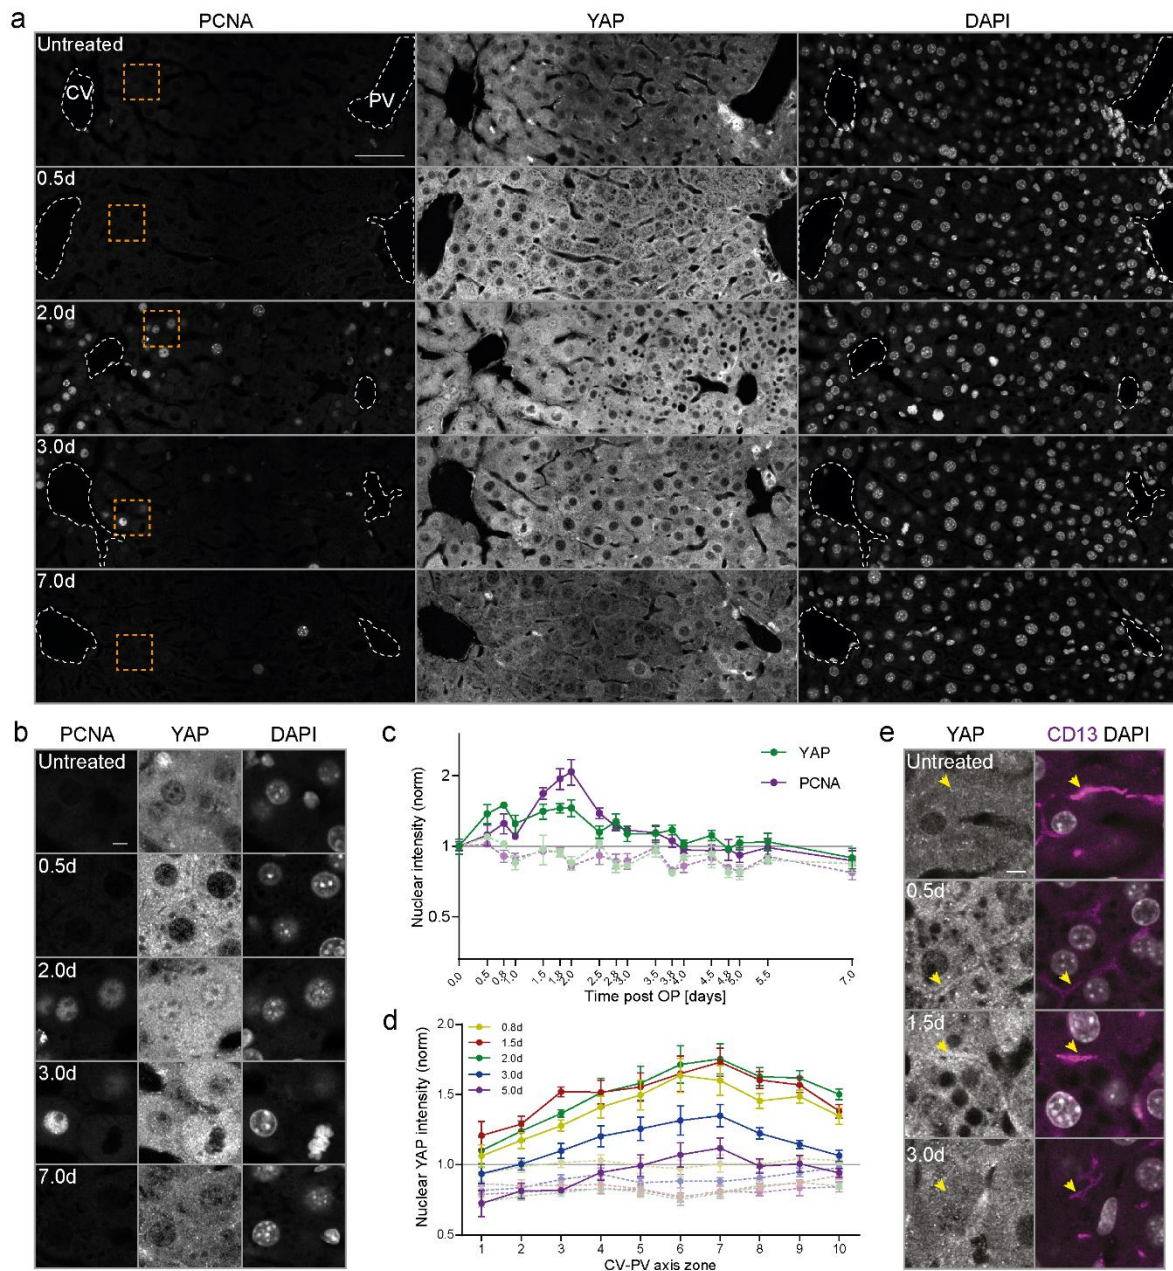

**Figure 3 BC network expansion coincides with activation of YAP during regeneration**

**a-b)** Fluorescence stainings for YAP, PCNA and with the nuclear marker DAPI on liver tissue sections from untreated mice and animals at indicated time points post PH. Images show an entire CV-PV axis (CV, left; PV, right). Indicated regions (orange squares) are shown as magnifications in (b). Note, the bright YAP fluorescence in the PV area stem from cholangiocytes of the bile duct. **c)** Quantification of the mean nuclear YAP (green) and PCNA (magenta) intensity from images of liver tissue sections at indicated timepoints post PH (solid line) and sham OP (dashed line) as representatively shown in (a) and Fig.S4a. Data was normalized to untreated animals (timepoint 0). Mean  $\pm$  s.e.m, n=3-5 mice per timepoint. Nuclear YAP and PCNA intensity of PH vs. sham time course,  $p < 0.0001$ . **d)** Spatial analysis of the mean nuclear YAP intensity from images as representatively shown in (a) and Fig.S4a, at indicated time points post PH (solid line) or sham OP (dashed line) in 10 zones within the CV-PV axis (zone 1, CV area; zone 10, PV area). Data is normalized to untreated animals (not shown). Mean  $\pm$

s.e.m, n=3-5 mice per timepoint. Nuclear YAP intensity of sham vs. PH mice,  $p < 0.0001$  (at 0.8 d, 1.5 d, 2 d, 3 d) and  $p < 0.01$  (at 5 d). **e)** Fluorescence stainings for YAP, CD13 and with the nuclear marker DAPI on liver tissue sections from an untreated mouse or animals at indicated time points post PH. Arrows indicate BC. Note the enrichment of apical YAP at 0.5 and 1.5d post PH. Images in a, b and e are background-subtracted. Scale bars, 50  $\mu\text{m}$  (a, e), 5  $\mu\text{m}$  (b).

Figure 4

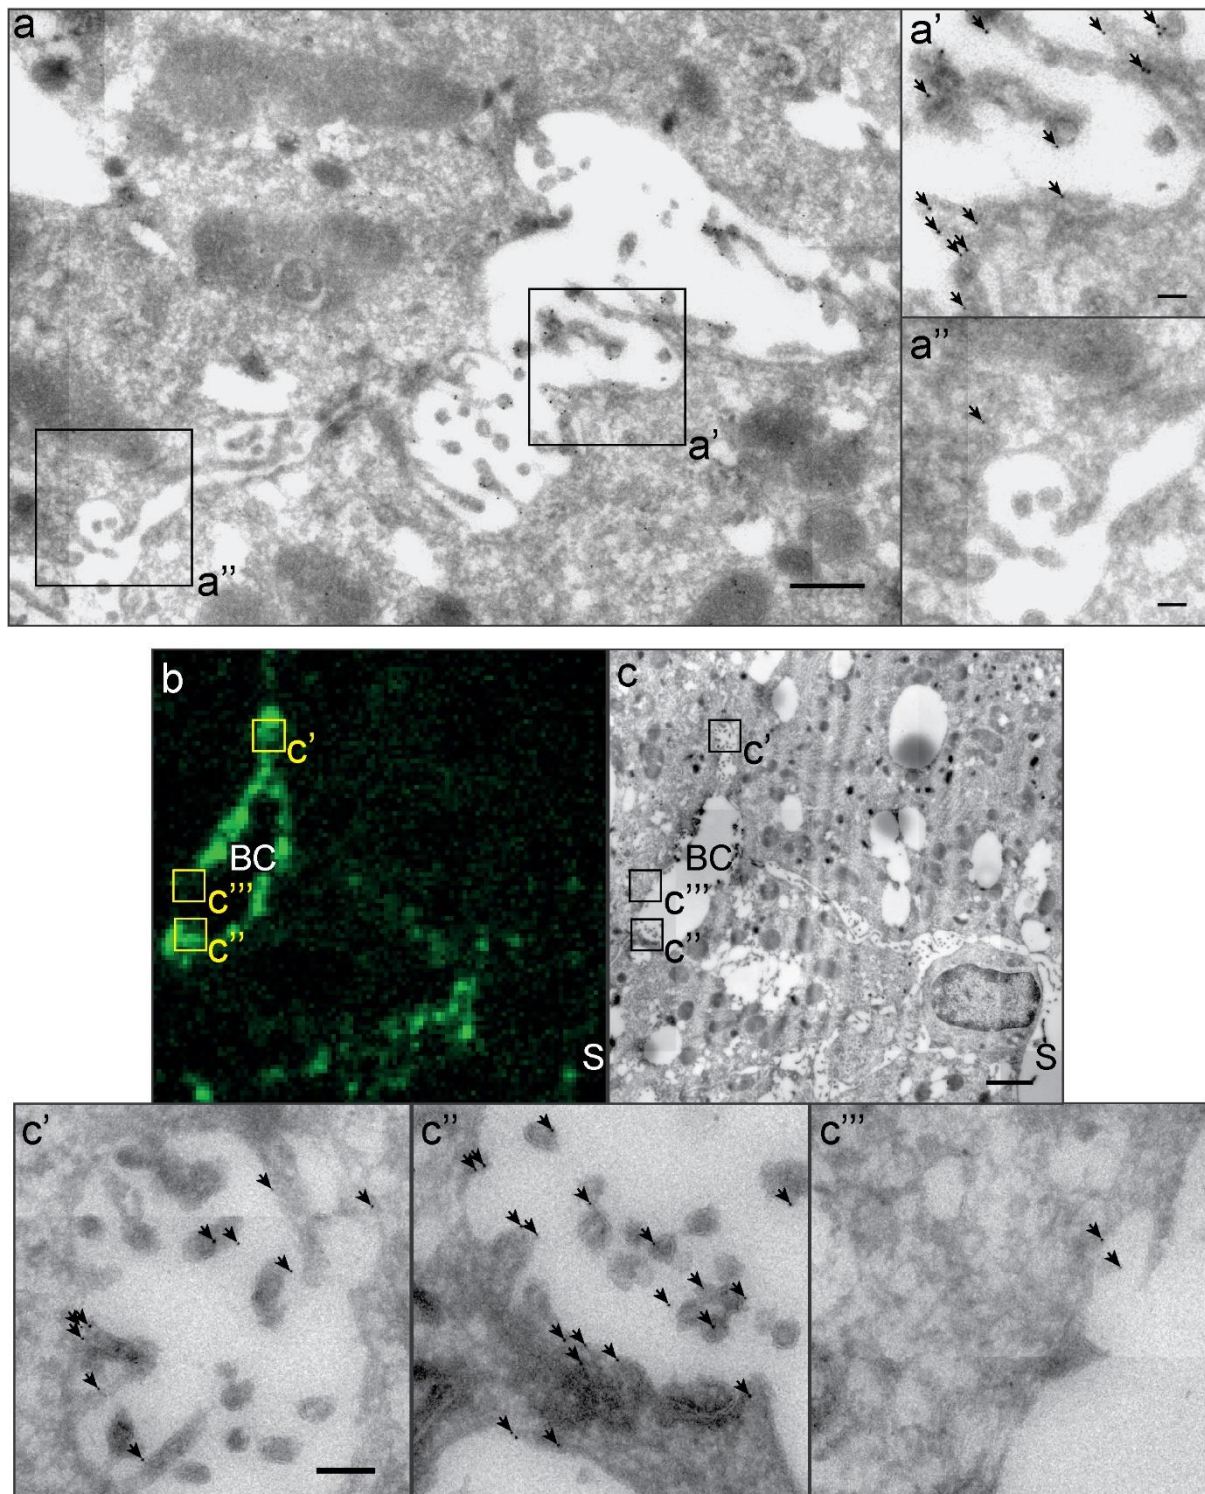

**Figure 4 YAP enriches in F-actin rich areas in the apical compartment of hepatocytes during regeneration**

**a)** EM image of immunogold-labelled YAP on liver tissue sections at 1.8 d post PH. Image (a) shows a BC in between two hepatocytes. Indicated regions (black squares) of the apical (a') and the basolateral (a'') membrane of the hepatocyte are shown as magnification. Arrows indicate gold particles. **b, c)** Correlative light and electron microscopy of F-actin (b) and YAP (c) on a liver tissue section at 1.8 d post PH. YAP was detected by immunogold-labelling, F-actin by fluorescence staining with phalloidin.



Indicated BC regions with high ( $c'$ ,  $c''$ ) or low ( $c'''$ ) F-actin levels are shown as magnifications. Arrows indicate gold particles. The image in (b) is background-subtracted. Scale bar, 0.5  $\mu\text{m}$  (a), 0.1  $\mu\text{m}$  ( $a'$ ,  $a''$ ), 2  $\mu\text{m}$  (c), 0.2  $\mu\text{m}$  ( $c'$ ). BC, bile canaliculus; S, sinusoid.

Figure 5

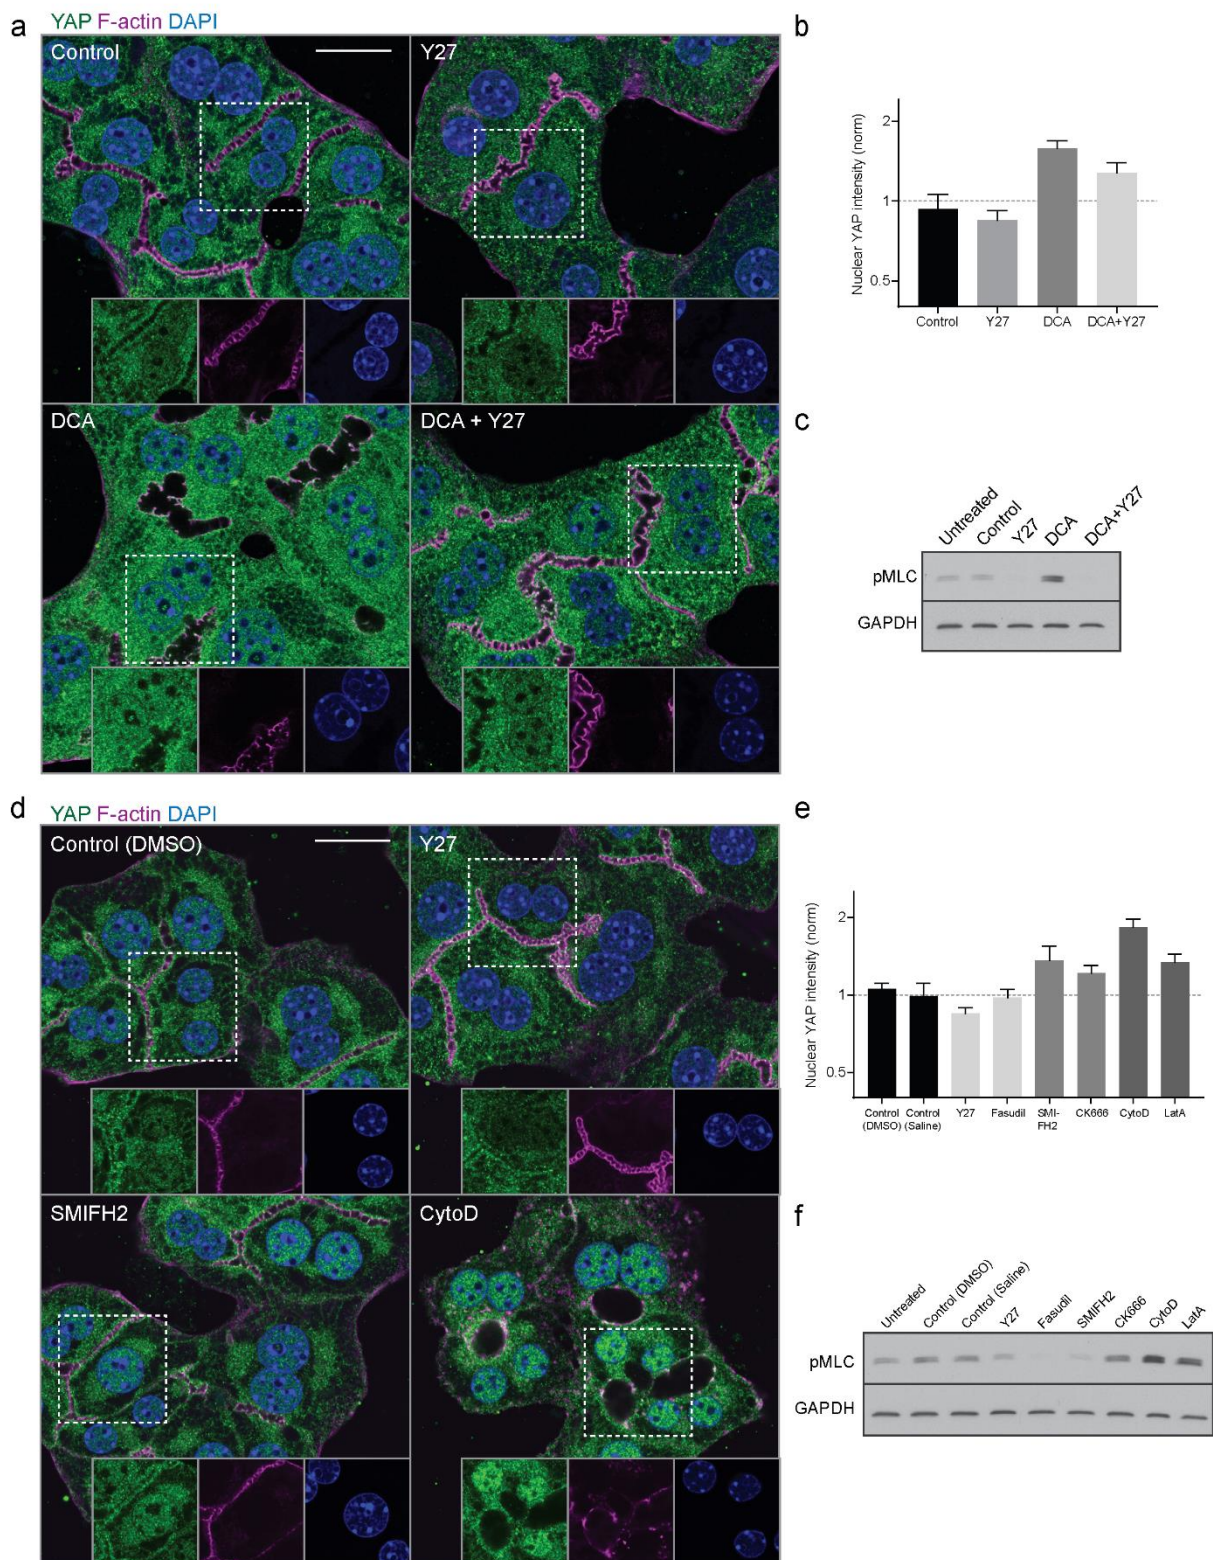

**Figure 5 Bile acids activate YAP via the acto-myosin system**

**a)** Fluorescence stainings for YAP (green), F-actin (magenta) and with the nuclear marker DAPI (blue) of primary hepatocyte cultures treated with DMSO (control), Y27, deoxycholic acid (DCA) or DCA+Y27 for ~18 h. Indicated areas (dashed rectangle) are shown as magnifications in insets. **b)** Quantification of the mean nuclear YAP intensity from fluorescence images of primary hepatocytes treated with

DMSO (control), Y27, DCA or DCA+Y27 for ~18 h as representatively shown in (a). Data is normalized to untreated cells (not shown). Mean  $\pm$  s.e.m., n = 7; DMSO vs. DCA, p < 0.0001; DMSO vs. Y27, p > 0.05 (n.s.); DMSO vs. DCA+Y27, p < 0.05; DCA vs. DCA + Y27, p = 0.05. **c)** Western blot of pMLC and GAPDH (loading control) in primary hepatocyte culture lysates. Cells were untreated or incubated for 18 h with the indicated compounds **d)** Fluorescence stainings of primary hepatocytes for YAP (green), F-actin (magenta) and with the nuclear marker DAPI (blue). Cells were treated with DMSO (control), Y27, SMIFH2 or Cytochalasin D (CytoD) for 6 h. Indicated areas (dashed rectangle) are shown as magnifications in insets. **e)** Quantification of the mean nuclear YAP intensity from images of primary hepatocytes treated with DMSO, Saline, Y27, Fasudil, SMIFH2, CK666, CytoD or Latrunculin A (LatA) for 6 h. Saline serves as control for Fasudil, DMSO serves as control for all other conditions. Inhibitors affecting similar actin processes are displayed in the same grey level. Saline, Fasudil, CK666 and LatA conditions are not shown in (d). Data is normalized to untreated cells (not shown). Mean  $\pm$  s.e.m., n=3-5; DMSO vs. Y27, p < 0.01; DMSO vs. CytoD, p < 0.0001; DMSO vs. LatA, p < 0.05; all other conditions are n.s. (p > 0.05) compared to the control. **f)** Western blot of pMLC and GAPDH (loading control) in untreated or actin inhibitor-treated primary hepatocyte culture lysates. Inhibitor treatments are the same as in (e). Scale bars, 20  $\mu$ m (a, d).

Figure 6

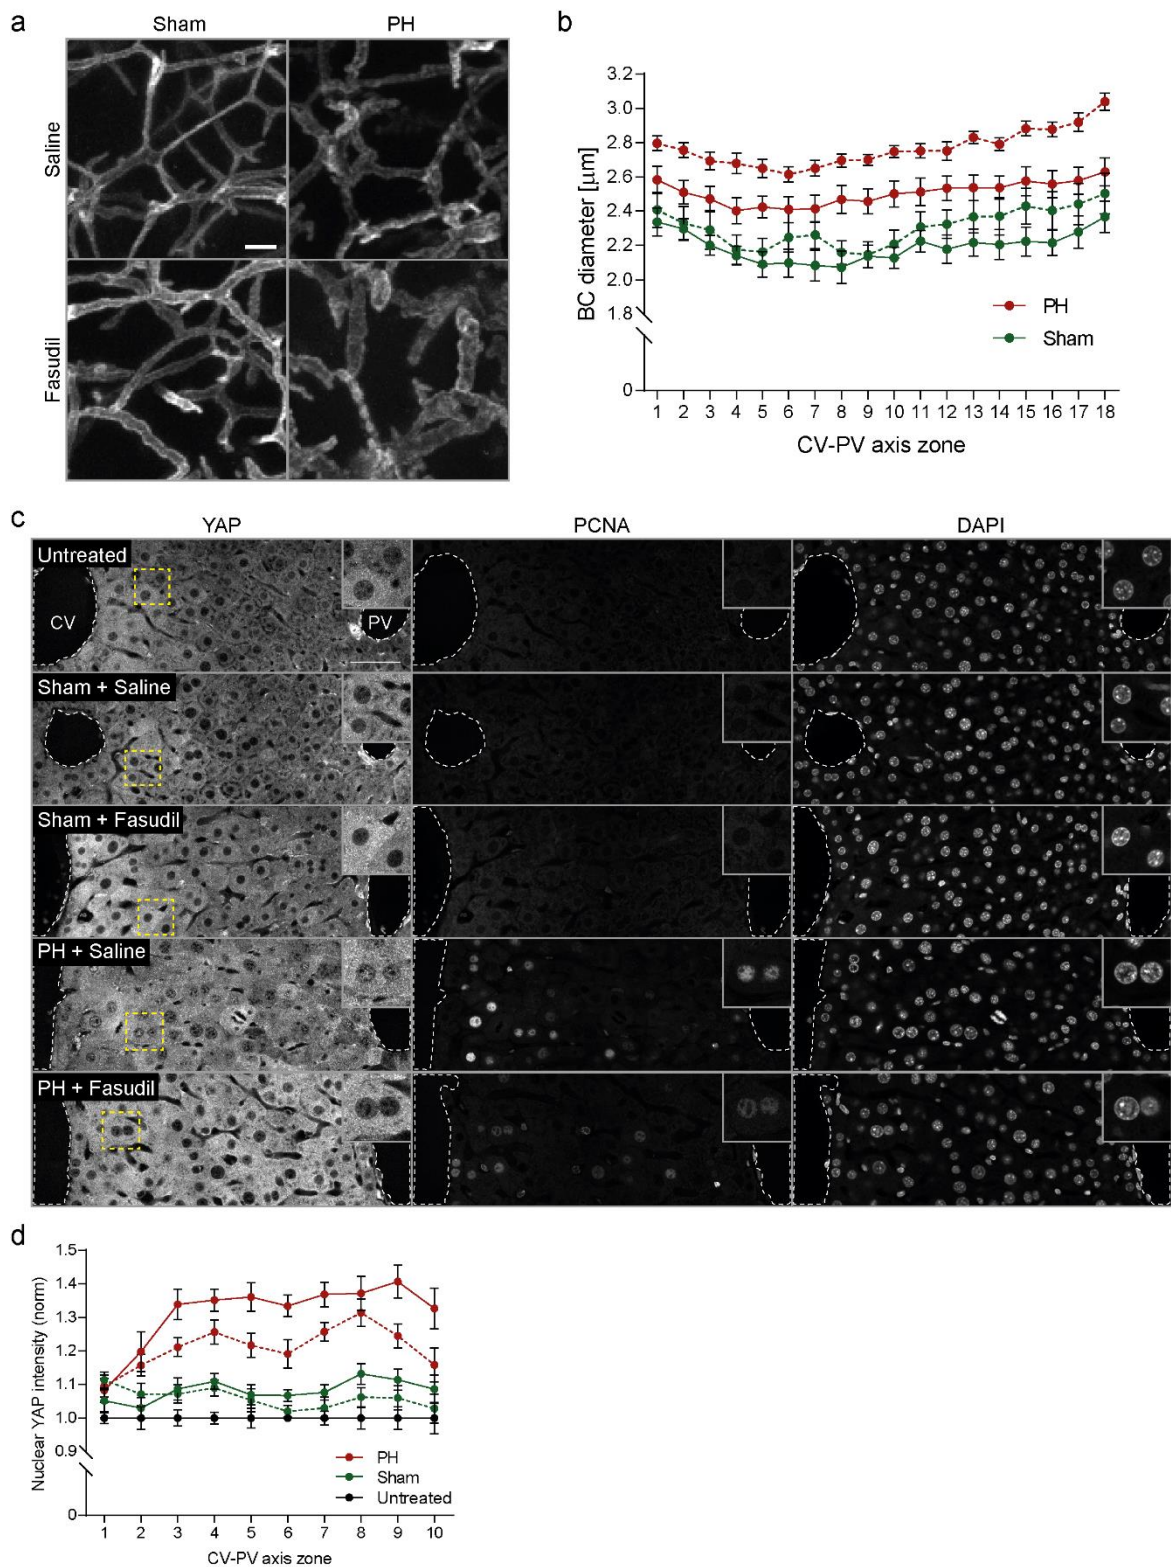

**Figure 6 Inhibition of Rho kinase reduces YAP nuclear accumulation during regeneration**

**a)** Fluorescence stainings for the apical marker CD13 on liver tissue sections from mice at 2 d post sham OP or PH, treated with saline (control) or the Rho kinase inhibitor Fasudil for 1 h. Shown are maximum projections of 50  $\mu\text{m}$  stacks in the PV area. **b)** Quantification of BC diameter within 18 zones along the CV-PV axis (zone 1, peri-central; zone 18, peri-portal) from mice at 2 d post sham OP (green) or PH (red), treated with saline (control, solid line) or Fasudil (dashed line). Diameter was measured from 3D BC network reconstructions of image stacks as representatively shown in (a). The zones

directly adjacent to the CV and PV were excluded from the analysis (~ 1 cell layer). Mean  $\pm$  s.e.m, n=7-8 mice per condition from 3 independent experiments. BC diameter of sham operated mice treated with saline vs. Fasudil,  $p < 0.0001$ ; BC diameter of PH mice treated with saline vs. Fasudil,  $p < 0.0001$ . **c)** Fluorescence stainings for YAP, PCNA and with the nuclear marker DAPI on liver tissue sections from untreated mice or animals at 2 d post sham OP or PH, treated with saline (control) or Fasudil for 1 h. Indicated regions (dashed rectangle) are shown as magnifications in insets. **d)** Quantification of the mean nuclear YAP intensity within 10 zones along the CV-PV axis, (zone 1, peri-central; zone 10, peri-portal) from IF images as representatively shown in (c). Data was normalized to untreated animals. Mean  $\pm$  s.e.m, n=7-8 mice per condition from 3 independent experiments. Nuclear YAP intensity of sham operated mice treated with saline vs. Fasudil,  $p > 0.05$  (n.s.) ; nuclear YAP intensity of PH mice treated with saline vs. Fasudil,  $p < 0.001$ . Scale bars, 5  $\mu\text{m}$  (a), 50  $\mu\text{m}$  (c).

Figure 7

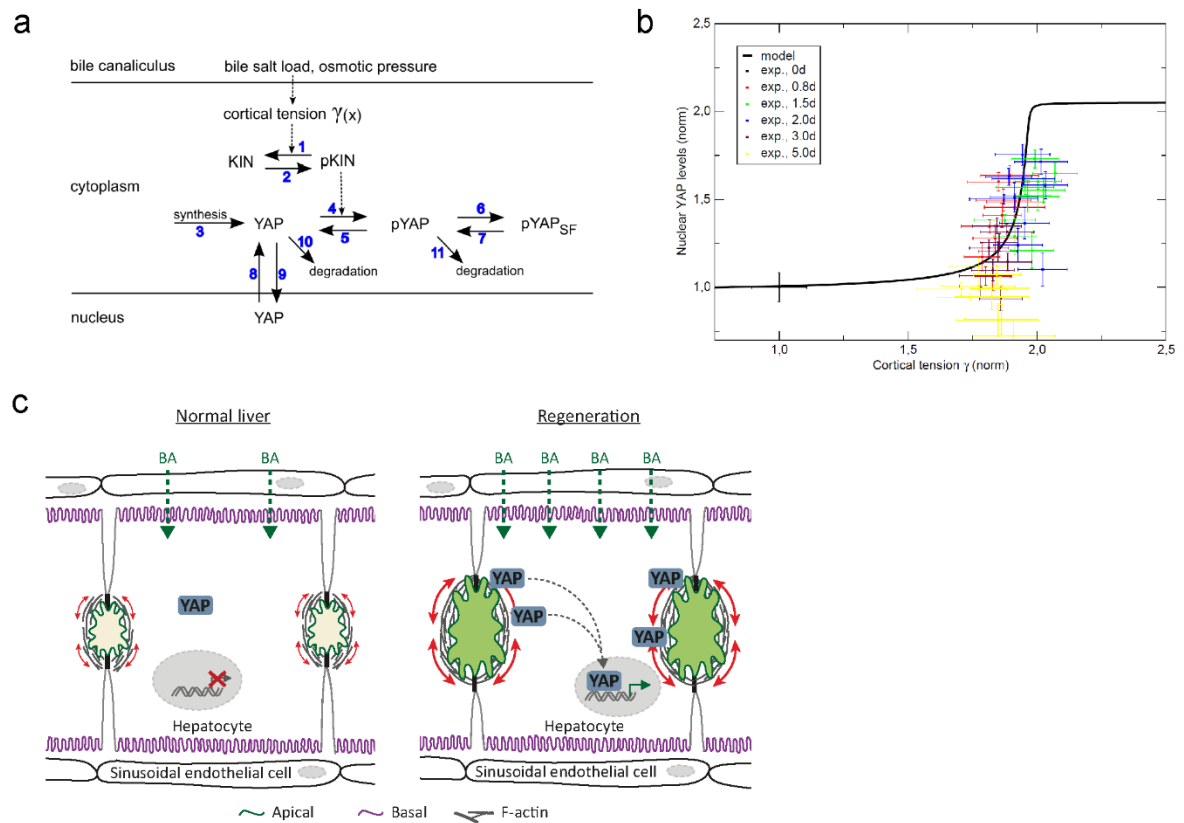

**Figure 7 Model of mechano-sensing of metabolic status during liver regeneration.**

**a)** Model of YAP regulation by cortical tension of the BC. Arrows denote reactions or transport steps. Blue numbers label individual processes and associated parameters as listed in Table S2. KIN, kinase; pKIN, phosphorylated kinase; pYAP, phosphorylated YAP; SF, sequestration factor. See Experimental Procedures for model equations and analysis. **b)** Model prediction (solid black line) of cortical tension and nuclear YAP levels reveals a sigmoidal stimulus-response curve. Experimental data (symbols) of nuclear YAP is reproduced from Fig.3d and mapped to cortical tension levels using experimental data from Fig.1b and Fig.2d. **c)** Schematic drawing of YAP regulation by BA through canalicular cortical tension. Tissue resection by partial hepatectomy induces a BA overload which elevates osmotic pressure and cortical tension of bile canaliculi. Concomitant changes of apical acto-myosin properties recruit YAP to the apical cortex where it is activated for nuclear translocation.
